# Supplementary material for: Diagnostic Accuracy of SARS-CoV-2 Antigen Tests for Community Transmission Screening: A Systematic Review and Meta-Analysis
Source: MDPI journal article supplement (doi:10.3390/ijerph182111451), 2021-10-30
Supplement: s1 [file s1]

## Supplementary Material

### Sensitivities and specificities of included studies

Forest plot of sensitivity

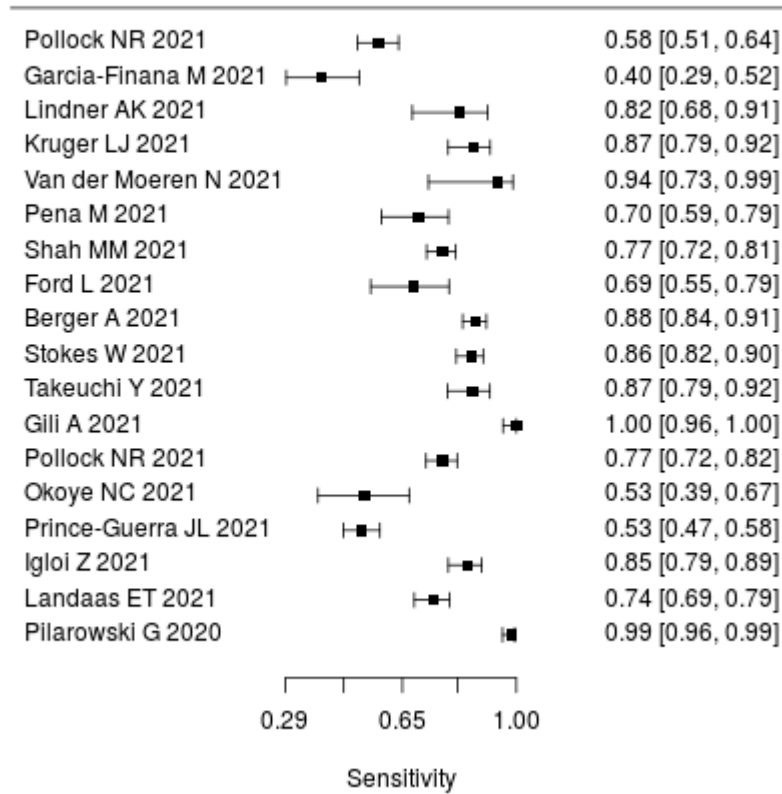

Sensitivities and 95% CIs of antigen tests for SARS-CoV-2 from the included studies

### Forest plot of specificity

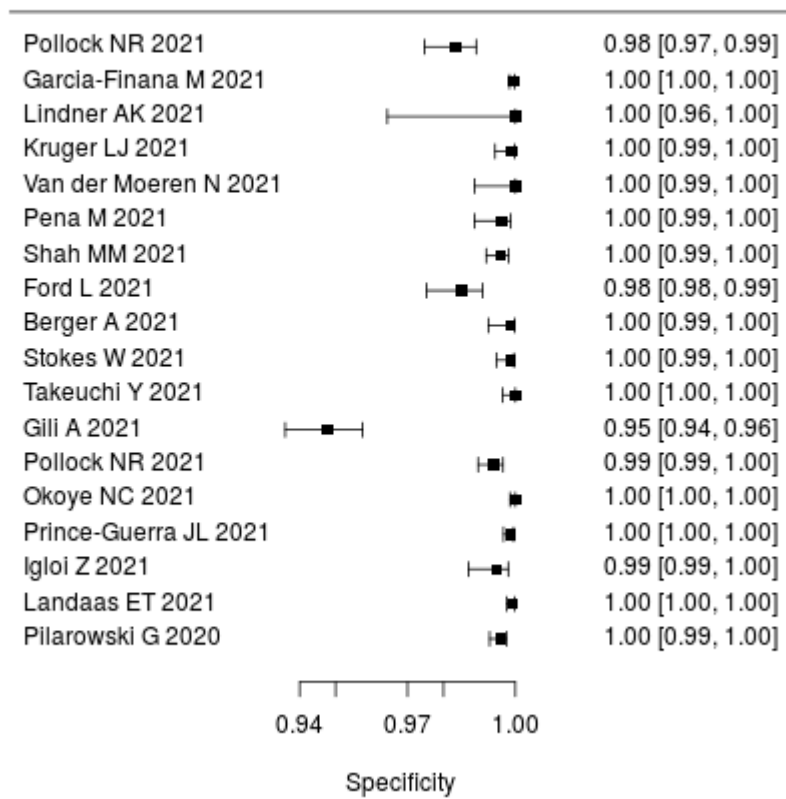

Specificities and 95% CIs of antigen tests for SARS-CoV-2 from the included studies
