# Supplementary material for: Diagnostic Accuracy of SARS-CoV-2 Antigen Tests for Community Transmission Screening: A Systematic Review and Meta-Analysis
Source: MDPI journal article supplement (doi:10.3390/ijerph182111451), 2021-10-30
Supplement: s1 [file s1]

## Supplementary Material

### Statistical data of subgroup analyses

#### Statistical data of symptomatic participants in the community

| Study                 | True<br>Positive | False<br>Positive | False<br>Negative | True<br>Negative |
|-----------------------|------------------|-------------------|-------------------|------------------|
| Pollock NR 2021       | 52               | 9                 | 17                | 163              |
| Lindner AK 2021       | 33               | 0                 | 7                 | 104              |
| Krüger LJ 2021        | 79               | 1                 | 12                | 620              |
| Van der Moeren N 2021 | 16               | 0                 | 1                 | 334              |
| Shah MM 2021          | 221              | 2                 | 60                | 905              |
| Ford L 2021           | 30               | 1                 | 8                 | 180              |
| Takeuchi Y 2021       | 66               | 0                 | 6                 | 699              |
| Pollock NR 2021       | 116              | 1                 | 12                | 376              |
| Prince-Guerra JL 2021 | 113              | 0                 | 63                | 651              |
| Pilarowski G 2020     | 120              | 5                 | 0                 | 546              |

#### Statistical data of asymptomatic participants in the community

| Study                 | True<br>Positive | False<br>Positive | False<br>Negative | True<br>Negative |
|-----------------------|------------------|-------------------|-------------------|------------------|
| Pollock NR 2021       | 83               | 12                | 82                | 1080             |
| García-Fiñana M 2021  | 28               | 3                 | 42                | 5431             |
| Krüger LJ 2021        | 12               | 0                 | 2                 | 374              |
| Peña M 2021           | 51               | 3                 | 22                | 766              |
| Shah MM 2021          | 33               | 5                 | 15                | 824              |
| Ford L 2021           | 7                | 14                | 9                 | 802              |
| Pollock NR 2021       | 110              | 11                | 54                | 1628             |
| Okoye NC 2021         | 24               | 0                 | 21                | 2593             |
| Prince-Guerra JL 2021 | 44               | 4                 | 79                | 2465             |

#### Statistical data of participants within 7 days after symptom onset

| Study             | True<br>Positive | False<br>Positive | False<br>Negative | True<br>Negative |
|-------------------|------------------|-------------------|-------------------|------------------|
| Shah MM 2021      | 199              | 2                 | 44                | 684              |
| Pollock NR 2021   | 104              | 0                 | 7                 | 335              |
| Pilarowski G 2020 | 120              | 5                 | 0                 | 546              |

**Statistical data of participants with Ct value less than or equal to 35**

| <b>Study</b>         | <b>True<br/>Positive</b> | <b>False<br/>Positive</b> | <b>False<br/>Negative</b> | <b>True<br/>Negative</b> |
|----------------------|--------------------------|---------------------------|---------------------------|--------------------------|
| García-Fiñana M 2021 | 28                       | 3                         | 42                        | 5431                     |
| Ford L 2021          | 37                       | 15                        | 11                        | 988                      |
| Stokes W 2021        | 231                      | 2                         | 37                        | 1371                     |
| Gili A 2021          | 90                       | 86                        | 0                         | 1562                     |
| Pilarowski G 2020    | 201                      | 13                        | 3                         | 3085                     |

**Statistical data of participants less than or equal to 18 of ages**

| <b>Study</b>      | <b>True<br/>Positive</b> | <b>False<br/>Positive</b> | <b>False<br/>Negative</b> | <b>True<br/>Negative</b> |
|-------------------|--------------------------|---------------------------|---------------------------|--------------------------|
| Pollock NR 2021   | 26                       | 7                         | 20                        | 200                      |
| Pollock NR 2021   | 94                       | 7                         | 41                        | 786                      |
| Pilarowski G 2020 | 28                       | 2                         | 1                         | 178                      |
